# Supplementary material for: Preparing Data for Artificial Intelligence in Pathology with Clinical-Grade Performance
Source: MDPI journal article supplement (doi:10.3390/diagnostics13193115), 2023-10-03
Supplement: s1 [file s1]

Table S1: The detailed information of the datasets in reviewed papers.

| Task                                 | Data set  | Cancer type                                       | Scanner                           | Patch size | Annotation method      | Pre-processing method |
|--------------------------------------|-----------|---------------------------------------------------|-----------------------------------|------------|------------------------|-----------------------|
| <b>Classification</b> <sup>[7]</sup> | 227 WSIs  | High-grade<br>extrauterine<br>serous<br>carcinoma | Pannoramic SCAN 0.22<br>μm/pixel  | /          | Pixel-level annotation | /                     |
| <b>Classification</b> <sup>[8]</sup> | 3212 WSIs | Gastric                                           | Hamamatsu;Roche;<br>KFBio;<br>20X | 320 × 320  | Pixel-level annotation | Data augmentation     |
| <b>Classification</b> <sup>[9]</sup> | 896 WSIs  | Gastric                                           | Nanozoomer 2.0-HT                 | 224x224    | Weak annotation(box)   | Data augmentation     |

|                                           |             |          |                                                                                               |         |                 |                                                                                             |
|-------------------------------------------|-------------|----------|-----------------------------------------------------------------------------------------------|---------|-----------------|---------------------------------------------------------------------------------------------|
| <b>Classification</b> <sup>[10]</sup>     | 4712 WSIs   | Prostate | Pannoramic Flash II 250<br>(3DHistech, Hungary)<br>scanner at a pixel<br>resolution of 0.24µm | /       | WSI-level       | /                                                                                           |
| <b>Gleason grading</b><br><sub>[11]</sub> | 641 WSIs    | Prostate | NanoZoomer-XR                                                                                 | 224x224 | Weak annotation | Data augmentation<br>(rotations, flipping and<br>color jittering)                           |
| <b>Classification</b> <sup>[19]</sup>     | 3470 WSIs   | Breast   | Carl Zeiss slide scanner,<br>40X resolution (0.249<br>microns per pixel)                      | 224x224 | WSI-level       | Data augmentation<br>(rotation, color<br>spectrum<br>augmentation1, color<br>normalization) |
| <b>Classification</b> <sup>[23]</sup>     | 44,732 WSIs | Breast   | Leica Aperio AT2<br>scanners at 20X<br>equivalent magnification<br>0.5 µm per pixel           | /       | Weak annotation | /                                                                                           |

|                                           |             |                                |                                                                                                              |         |                 |                                                                                      |
|-------------------------------------------|-------------|--------------------------------|--------------------------------------------------------------------------------------------------------------|---------|-----------------|--------------------------------------------------------------------------------------|
| <b>Classification</b> <sup>[25]</sup>     | 13,111 WSIs | Colorectal                     | KF-PRO-005 scanner<br>20X                                                                                    | 300x300 | Fine annotation | data augmentation<br>(image zoom, flip, color<br>change)                             |
| <b>Classification</b> <sup>[26]</sup>     | 7003 WSIs   | Lung                           | Aperio scanner in either<br>20X (0.50 $\mu$ m per pixel)<br>or 40X magnification<br>(0.25 $\mu$ m per pixel) | 224x224 | WSI-level       | Data augmentation<br>(flipping,translation,rota<br>tion, and color<br>augmentations) |
| <b>Gleason grading</b><br><sup>[27]</sup> | 1243 WSIs   | Prostate                       | 3DHistech Pannoramic<br>Flash II 250<br>20X(0.24 $\mu$ m per pixel )                                         | /       | WSI-level       | /                                                                                    |
| <b>Classification</b> <sup>[30]</sup>     | 1584 WSIs   | Pan-Renal<br>Cell<br>Carcinoma | /                                                                                                            | 224x224 | WSI-level       | data augmentation<br>techniques (random<br>horizontal flip and<br>random Crop)       |

|                                       |            |                                       |                                                                                                   |           |                 |                                                                |
|---------------------------------------|------------|---------------------------------------|---------------------------------------------------------------------------------------------------|-----------|-----------------|----------------------------------------------------------------|
| <b>Classification</b> <sup>[31]</sup> | 193 WSIs   | Oral<br>squamous<br>cell<br>carcinoma | Omnyx Integrated<br>Digital Pathology<br>system,40X 0.275μm per<br>pixel                          | 128x128   | Weak annotation | data augmentation<br>( random rotation and<br>random flipping) |
| <b>Classification</b> <sup>[33]</sup> | 9366 WSIs  | Gastric                               | Jiangfeng scanner at<br>40X,0.2513μm per pixel;<br>Hamamatsu scanner at<br>40X,0.2206μm per pixel | 768x768   | Fine annotation | Data standardization                                           |
| <b>Classification</b> <sup>[34]</sup> | 128 images | Prostate                              | NanoZoomer digital<br>slide scanner 0.23μm per<br>pixel                                           | 1024x1024 | Fine annotation | Data augmentation<br>(rotation, flip,<br>normalization)        |
| <b>Segmentation</b> <sup>[45]</sup>   | 54 WSIs    | Lung                                  | /                                                                                                 | 224x224   | Weak annotation | /                                                              |

|                                       |           |          |                                                                                       |         |                 |                                                                                                              |
|---------------------------------------|-----------|----------|---------------------------------------------------------------------------------------|---------|-----------------|--------------------------------------------------------------------------------------------------------------|
| <b>Classification</b> <sup>[49]</sup> | 2323 WSIs | Lung     | /                                                                                     | 224x224 | Fine annotation | Data augmentation<br>(flipping, rotations, and<br>shifts in brightness,<br>contrast, hue, and<br>saturation) |
| <b>Classification</b> <sup>[58]</sup> | 717 WSIs  | Prostate | Philips Ultra Fast<br>Scanner, Panoramic 250<br>Flash II scanner,<br>Olympus VS120-S5 | /       | Fine annotation | Data augmentation,<br>Rescanning, style<br>normalization                                                     |
| <b>Classification</b> <sup>[59]</sup> | 100WSIs   | Liver    | 20X,15X                                                                               | /       | Weak annotation | /                                                                                                            |
| <b>Classification</b> <sup>[61]</sup> | 422 WSIs  | Lung     | Leica Aperio whole-slide<br>scanner at 20x                                            | 224x224 | Fine annotation | Color normalization,<br>data augmentation<br>(rotation, flip)                                                |

|                                        |              |                                    |                                                                                        |           |                 |                         |
|----------------------------------------|--------------|------------------------------------|----------------------------------------------------------------------------------------|-----------|-----------------|-------------------------|
| <b>Classification</b> <sup>[66]</sup>  | 148 WSIs     | Translocation renal cell carcinoma | Leica Aperio scanner at $\times 40$                                                    | 2000x2000 | /               | Color normalization     |
| <b>Gleason grading</b> <sup>[71]</sup> | /            | Lymph node, prostate               | Ventana scanner of 0.25 $\mu$ m per pixel; Hamamatsu scanner of 0.23 $\mu$ m per pixel | /         | Fine annotation | Stain normalization     |
| <b>Prognostic</b> <sup>[86]</sup>      | /            | Gliomas                            | /                                                                                      | 1024x1024 | /               | Data augmentation (GAN) |
| <b>Classification</b> <sup>[90]</sup>  | 2647 patches | Cervical                           | /                                                                                      | 256x128   | Weak annotation | Data augmentation (GAN) |

|                                       |              |            |                                                       |         |                 |                                                                                                        |
|---------------------------------------|--------------|------------|-------------------------------------------------------|---------|-----------------|--------------------------------------------------------------------------------------------------------|
| <b>Detection</b> <sup>[94]</sup>      | 3000 patches | Colorectal | Aperio ScanScope XT at<br>40X of 0.061µm per<br>pixel | 256x256 | Fine annotation | /                                                                                                      |
| <b>Classification</b> <sup>[95]</sup> | 284 WSIs     | Lung       | BX53, Olympus<br>Corporation at 40X                   | 256x256 | /               | Data augmentation<br>(rotation, flipping, and<br>color correction,)                                    |
| <b>Segmentation</b> <sup>[96]</sup>   | 1400 images  | Gastric    | /                                                     | 512x512 | Weak annotation | data augmented<br>(horizontal flips,<br>rotations, random crops<br>and hue saturation value<br>shifts) |
| <b>Classification</b> <sup>[98]</sup> | 905 WSIs     | Stomach    | /                                                     | 256x256 | Fine annotation | Eliminate noises                                                                                       |

|                                        |                      |              |                                                                       |         |                 |                                                                            |
|----------------------------------------|----------------------|--------------|-----------------------------------------------------------------------|---------|-----------------|----------------------------------------------------------------------------|
| <b>Detection</b> <sup>[99]</sup>       | 45 WSIs              | Breast       | Leica Aperio AT2 whole slide scanner at 20X of 0.5 $\mu$ m per pixel. | 64x64   | Weak annotation | Data augmentation                                                          |
| <b>Classification</b> <sup>[100]</sup> | 3554 WSIs            | Lung         | 20X                                                                   | 512x512 | Fine annotation | Data augmentation (flip, translation, color shift)                         |
| <b>Classification</b> <sup>[106]</sup> | 5846 images          | Melanoma     | /                                                                     | /       | Box annotation  | Data augmentation (horizontal flip, random distort, rotations, crop, zoom) |
| <b>Classification</b> <sup>[108]</sup> | 400 WSI and 993 WSIs | Kidney, lung | /                                                                     | 256x256 | Fine annotation | /                                                                          |



|                                        |          |            |                                                                               |         |                 |                                                                                                                |
|----------------------------------------|----------|------------|-------------------------------------------------------------------------------|---------|-----------------|----------------------------------------------------------------------------------------------------------------|
| <b>Classification</b> <sup>[111]</sup> | 508 WSIs | Colorectal | Aperio AT2, Leica Biosystems at 40× resolution (0.25-μm pixel <sup>-1</sup> ) | 224x224 | Fine annotation | Data augmentation (rotation, flip, color jitter on the brightness, contrast, saturation and hue of each image) |
|----------------------------------------|----------|------------|-------------------------------------------------------------------------------|---------|-----------------|----------------------------------------------------------------------------------------------------------------|
